# Supplementary material for: Micro/nanotextured polymer coatings fabricated by UV curing-induced phase separation: creation of superhydrophobic surfaces
Source: Royal Society of Chemistry journal article supplement (doi:10.1039/c2jm16675e), 2012-01-01
Supplement: c2jm16675e.pdf [file c2jm16675e.pdf]

## Electronic Supplementary Information.

### Micro/nanotextured polymer coatings fabricated by UV curing-induced phase separation technique: creation of superhydrophobic surfaces

Shinji Kato\* and Aya Sato

*Kawamura Institute of Chemical Research, 631 Sakado, Sakura, Chiba 285-0078, Japan*

#### 1. Additional Results

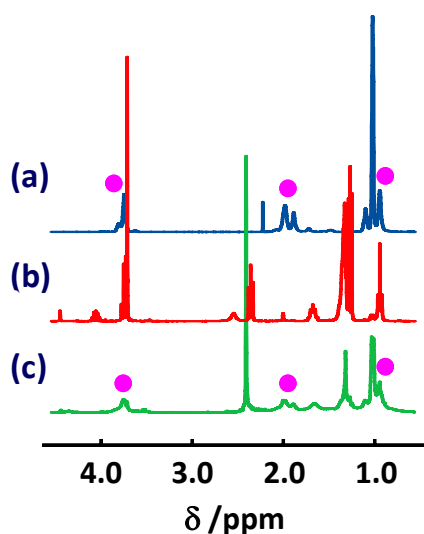

**Fig. S1** Comparison of <sup>1</sup>H-NMR spectra of PIBMA itself and extracted chemicals from the as-UV cured polymer films. (a) PIBMA dissolved in CDCl<sub>3</sub>, which was used as a soluble polymer component for the PIPS process. (b and c) The components extracted to ethanol and toluene, respectively. The polymer film was fabricated on silanized glass plates (38 x 26 mm<sup>2</sup>) by UV curing using a monomer mixture containing a 42:6:1 weight ratio of EGDMA, TBMA, and FMA, respectively, with a porogenic additive of 10 wt % PIBMA ( $M_w$  of  $3.0 \times 10^5$  g mol<sup>-1</sup>) in methyl caprate. After the UV curing process, the polymer film was quickly washed by ethanol flushing as a standard procedure in the present method, followed by thoroughly washed with toluene by immersion for 48 h at room temperature. Both extracts were evaporated and the residual chemicals were dissolved in CDCl<sub>3</sub> for the <sup>1</sup>H-NMR measurements with anthracene as internal reference for quantitative evaluation.

**Table S1** Viscosity data of the PIPS precursors. All the precursors consist of a monomer mixture of EGDMA, TBMA, and FMA (42:6:1 in weight ratio) and a certain porogenic additive in 4:3 volume ratio. The viscosity data are displayed for each solvent as a function of PIBMA concentration (wt %) in the porogenic additives.

| Solvent | Viscosity / mPa·s <sup>a</sup>      |      |      |      |      |      |
|---------|-------------------------------------|------|------|------|------|------|
|         | Concentration of PIBMA <sup>b</sup> |      |      |      |      |      |
|         | 0%                                  | 1.0% | 3.0% | 5.0% | 10%  | 20%  |
| MeHex   | 1.42                                |      |      |      | 7.08 | 23.7 |
| MeOct   | 1.75                                |      |      | 4.40 | 8.57 | 24.7 |
| MeCap   | 2.29                                | 2.55 | 3.89 | 5.30 | 9.90 | 25.3 |
| MeLau   | 2.44                                | 2.93 |      |      | 11.5 | 31.0 |
| MeMyr   | 2.92                                | 3.57 | 5.11 | 6.82 | 11.8 | 32.0 |
| MePal   | 3.11                                |      |      | 7.43 | 13.3 |      |

<sup>a</sup> At 23 °C. <sup>b</sup> Weight percent of PIBMA in porogenic mixtures.

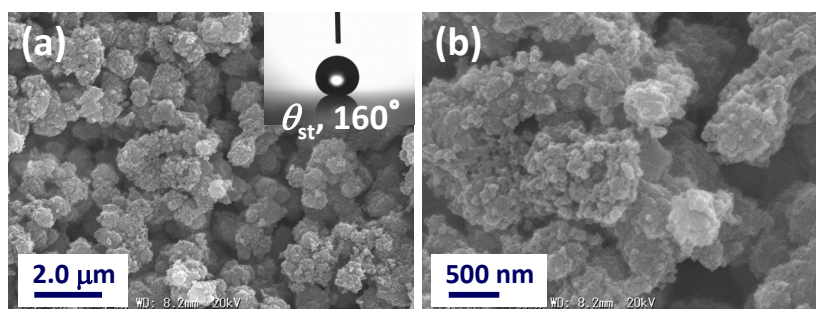

**Fig. S2** Scanning electron microscope (SEM) images of the microtextured polymer film, which was prepared in the absence of the fluorinated monomer, FMA. The polymer film was fabricated on a silanized glass plate (38 x 26 mm<sup>2</sup>) by UV curing using a monomer mixture containing a 42:6 weight ratio of EGDMA and TBMA, respectively, with a porogenic additive of 10 wt % PIBMA ( $M_w$  of  $3.0 \times 10^5$  g mol<sup>-1</sup>) in methyl caprate. (a) A surface image of the film with an inset indicating a profile of a water droplet. (b) A magnified image of the identical polymer film. For the SEM observation, the polymer film was coated with vacuum-deposited Pt thin layer (thickness, 5 nm) and then imaged using 12 – 20 kV accelerating voltage. Static contact angles were measured on sessile drops (4 μL) of distilled water at 23 °C under air. All the observed values were averaged for at least three measurements taken on different drops.

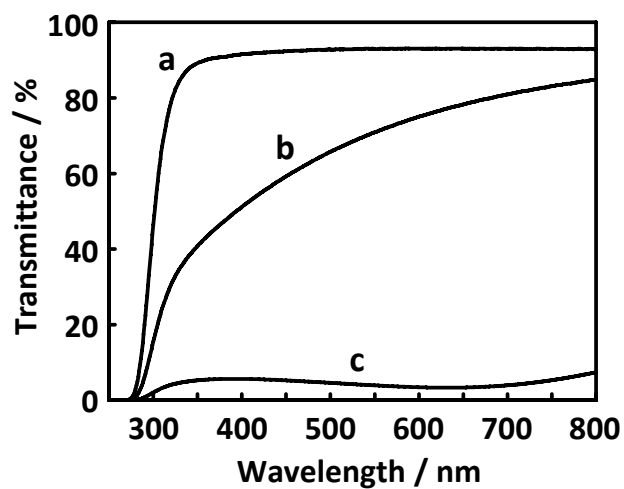

**Fig. S3** UV-vis transmittance spectra of the microtextured polymer films on silanized glass plates ( $38 \times 26 \text{ mm}^2$ ), which were fabricated by UV curing using a monomer mixture containing a 42:6:1 weight ratio of EGDMA, TBMA, and FMA, respectively, with a porogenic additive of 10 wt % PIBMA ( $M_w$  of  $3.0 \times 10^5 \text{ g mol}^{-1}$ ) in methyl myristate. Each spectrum was obtained for the films prepared under the spin-coat condition of (a) 7000 rpm, (b) 4000 rpm, and (c) 2000 rpm for 25 s.
